# Supplementary material for: Multinary light absorbing semiconductor nanocrystals with diversified electronic and optical properties
Source: Royal Society of Chemistry journal article supplement (doi:10.1039/d4na00043a), 2024-01-01
Supplement: d4na00043a1.pdf [file d4na00043a1.pdf]

COMMUNICATION

## Supporting Information

Received 00th January 20xx,  
Accepted 00th January 20xx

DOI: 10.1039/x0xx00000x

### Multinary light absorbing semiconductor nanocrystals with diversified electronic and optical properties

Soubantika Palchoudhury,<sup>a,\*</sup> Benjamin T. Diroll,<sup>b</sup> Panchapakesan Ganesh,<sup>c</sup> Jessica Cobos,<sup>d</sup> Sohini Sengupta,<sup>a</sup> Jingsong Huang<sup>c,\*</sup>

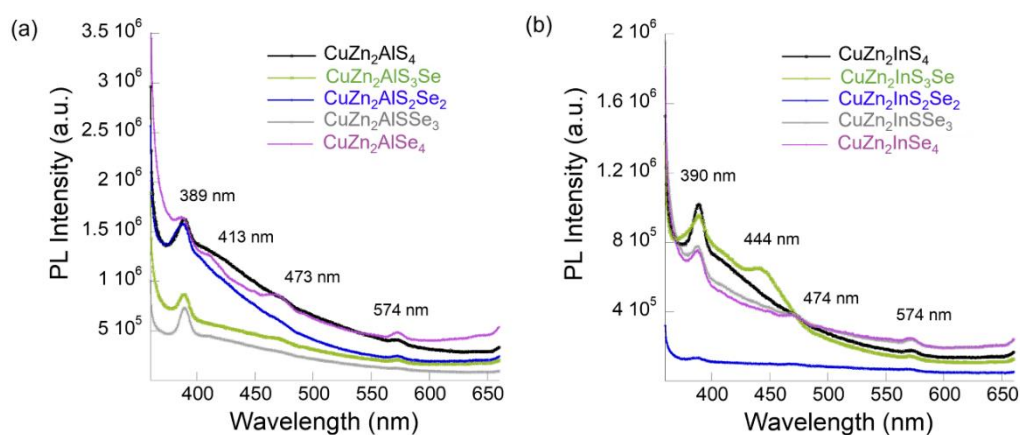

**Figure S1.** PL characterization of CZASse nanocrystals for 350 nm excitation. (a) CuZn<sub>2</sub>AlS<sub>x</sub>Se<sub>4-x</sub> compositions and (b) CuZn<sub>2</sub>InS<sub>x</sub>Se<sub>4-x</sub> compositions.

<sup>a</sup> Department of Chemical and Materials Engineering, University of Dayton, Dayton, Ohio, USA

E-mail: [spalchoudhury1@udayton.edu](mailto:spalchoudhury1@udayton.edu)

Tel: +1-937-229-3194

<sup>b</sup> Center for Nanoscale Materials, Argonne National Laboratory, Lemont, Illinois, USA

<sup>c</sup> Center for Nanophase Materials Sciences, Oak Ridge National Laboratory, Oak Ridge, Tennessee 37831, USA.

E-mail: [huangj3@ornl.gov](mailto:huangj3@ornl.gov)

Tel: +1-865-576-3991

<sup>d</sup> Mechanical Engineering, University of Texas at El Paso

† Footnotes relating to the title and/or authors should appear here.

Electronic Supplementary Information (ESI) available: [SEM and EDX analysis of the CZASse nanocrystals, PL analysis of the CuZn<sub>2</sub>AlSse and CuZn<sub>2</sub>InSse nanocrystals, XRD analysis and Rietveld fit of the CZASse nanocrystals, experimental bandgap and a table summarizing the bandgaps of CZASse nanocrystals, and band structure and density of states of the CuZn<sub>2</sub>AlSse and CuZn<sub>2</sub>InSse nanocrystals]. See DOI: 10.1039/x0xx00000x

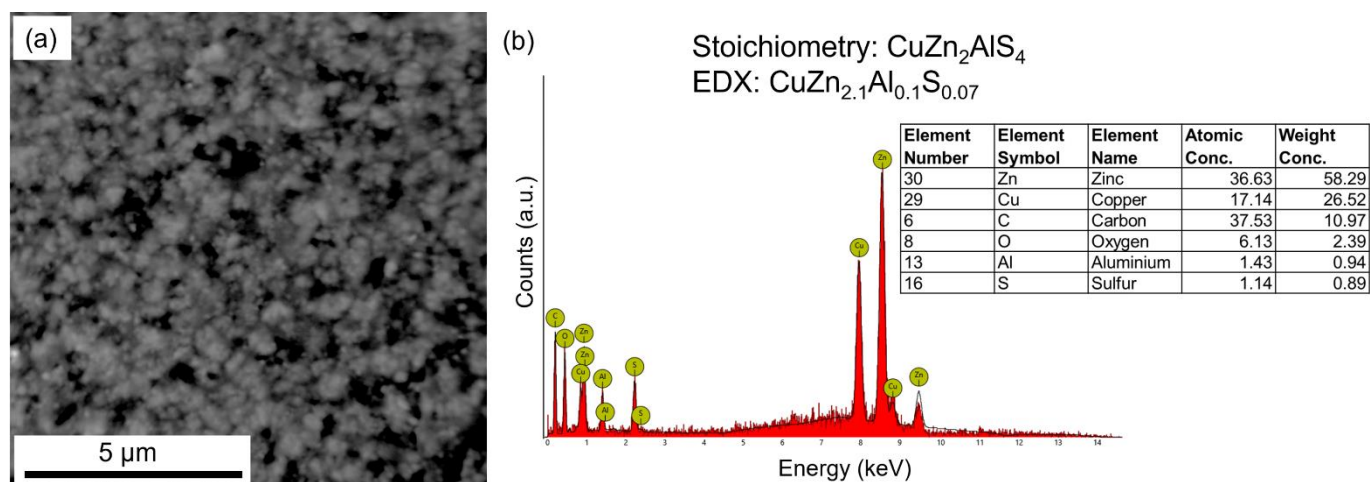

**Figure S2.** SEM and EDX characterization of  $\text{CuZn}_2\text{AlS}_4$  nanocrystals.

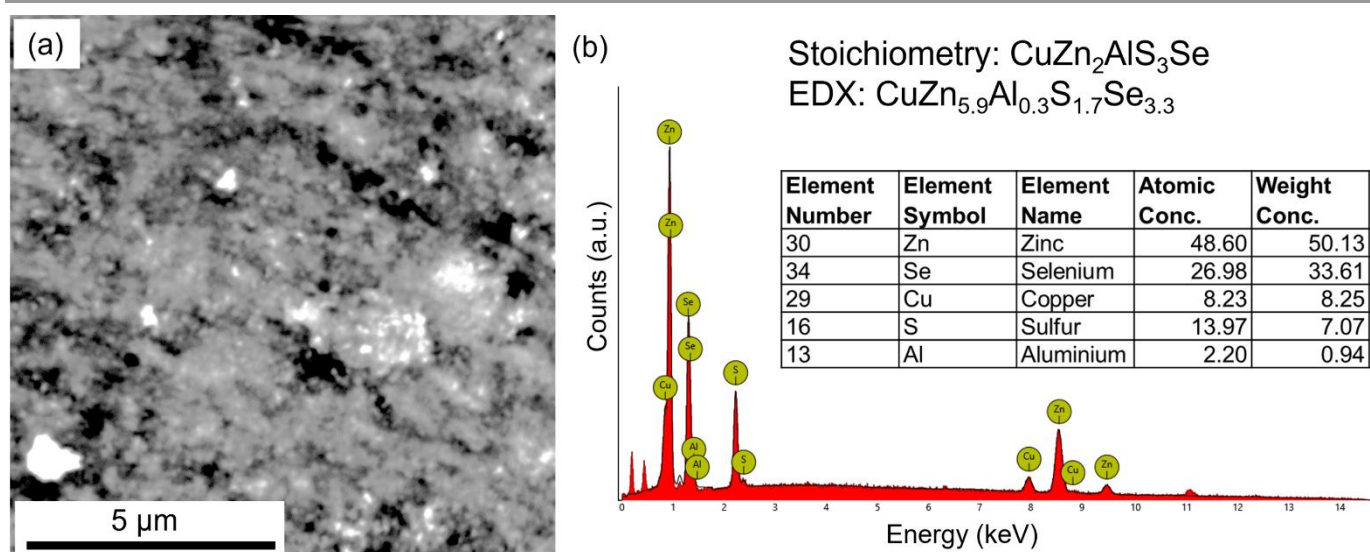

**Figure S3.** SEM and EDX characterization of  $\text{CuZn}_2\text{AlS}_3\text{Se}$  nanocrystals.

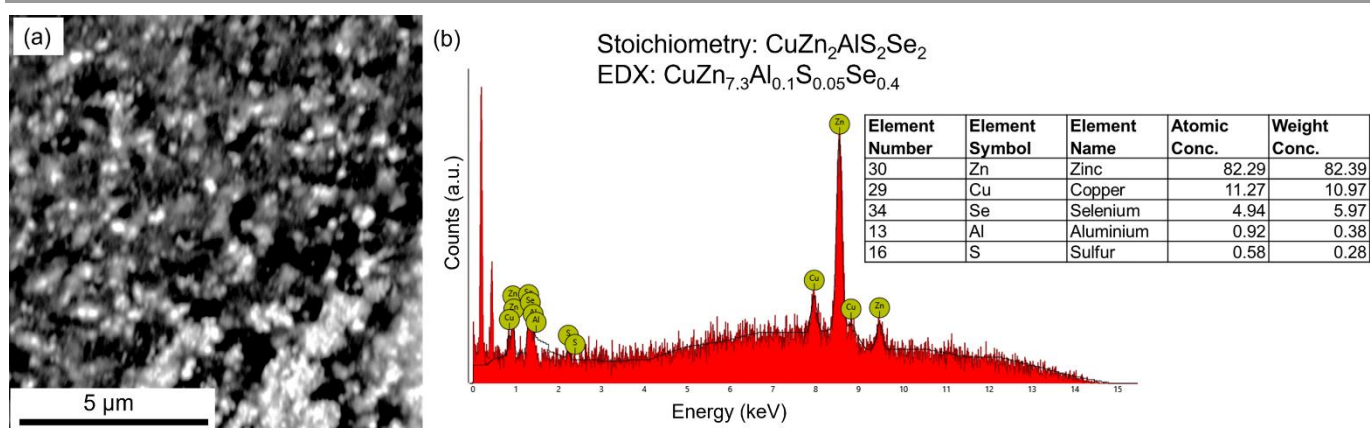

**Figure S4.** SEM and EDX characterization of  $\text{CuZn}_2\text{AlS}_2\text{Se}_2$  nanocrystals.

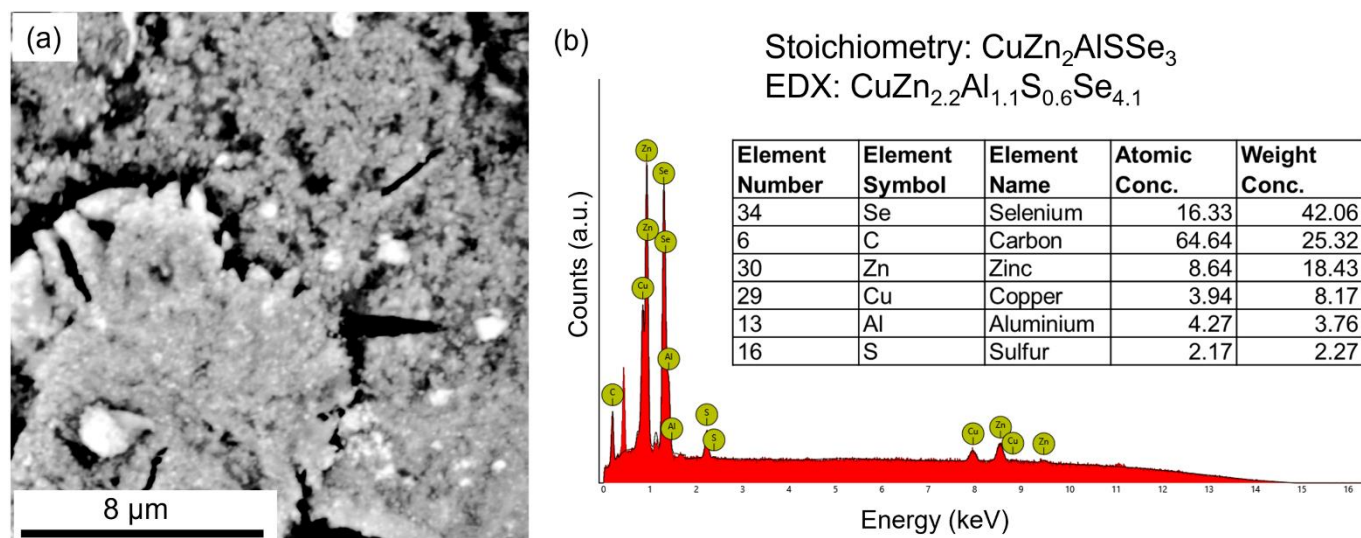

**Figure S5.** SEM and EDX characterization of  $\text{CuZn}_2\text{AlSe}_3$  nanocrystals.

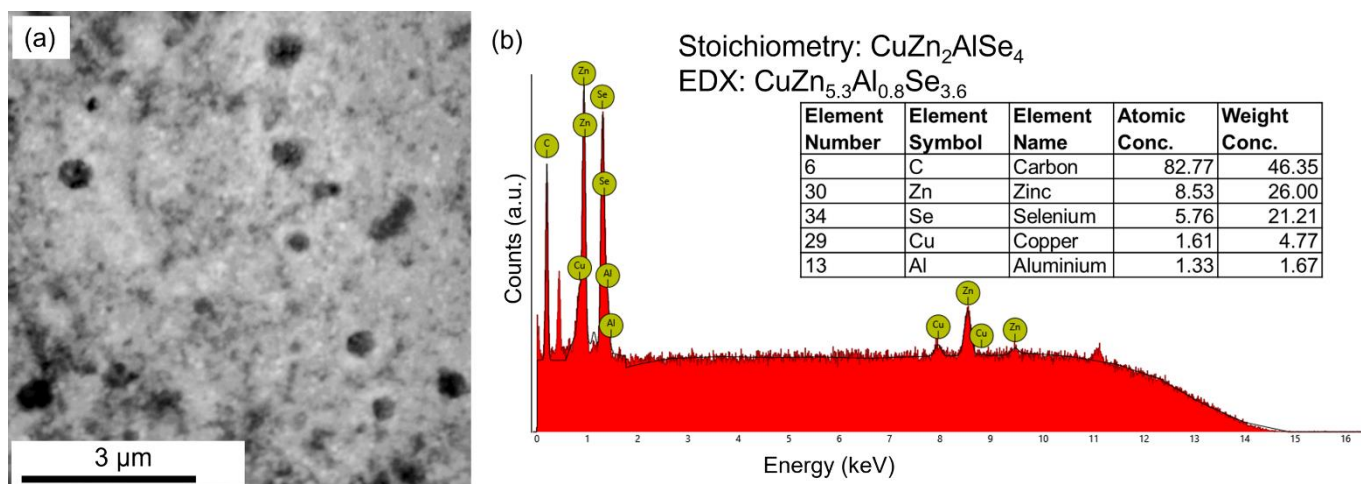

**Figure S6.** SEM and EDX characterization of  $\text{CuZn}_2\text{AlSe}_4$  nanocrystals.

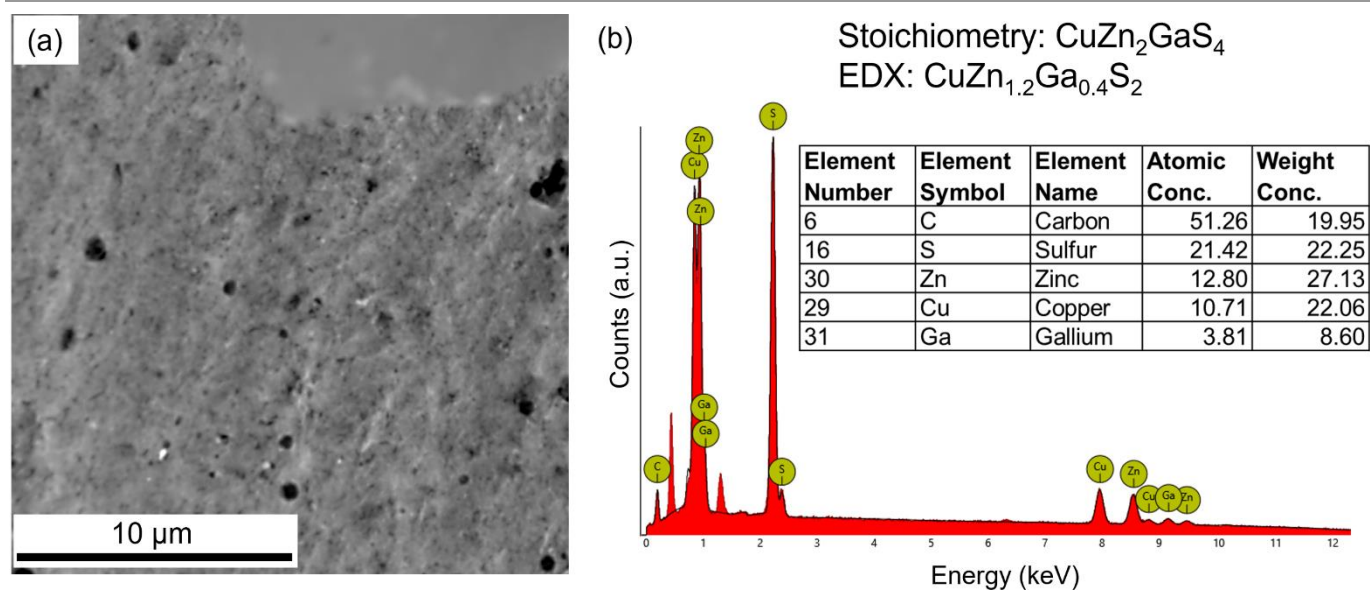

**Figure S7.** SEM and EDX characterization of  $\text{CuZn}_2\text{GaS}_4$  nanocrystals.

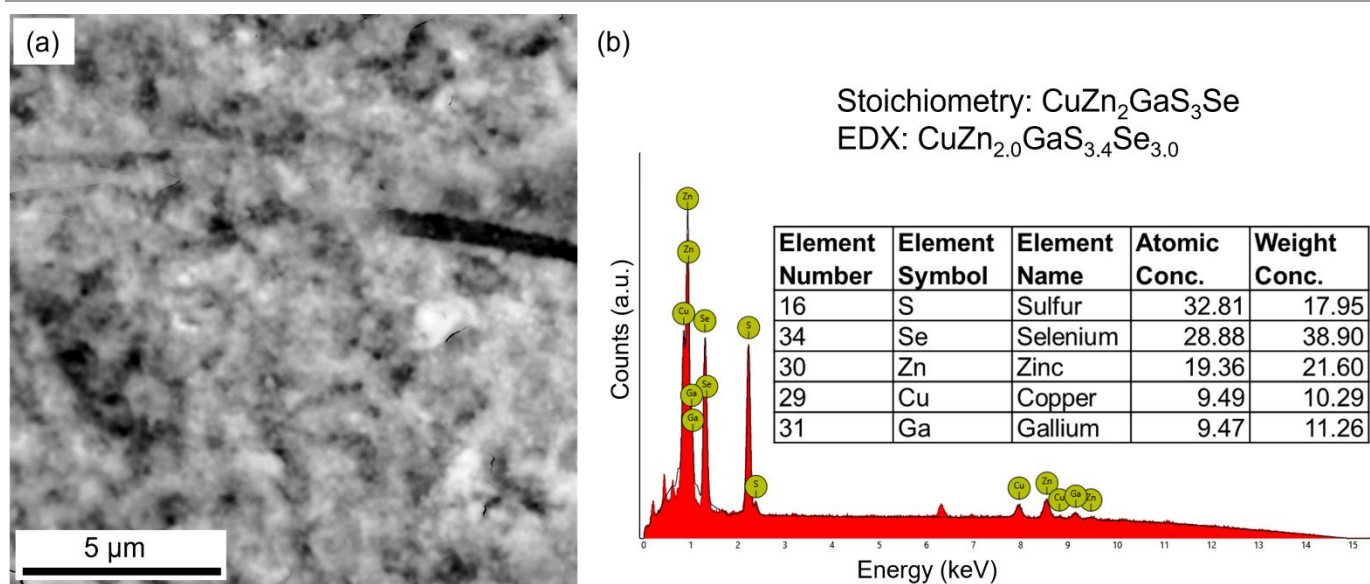

**Figure S8.** SEM and EDX characterization of  $\text{CuZn}_2\text{GaS}_3\text{Se}$  nanocrystals.



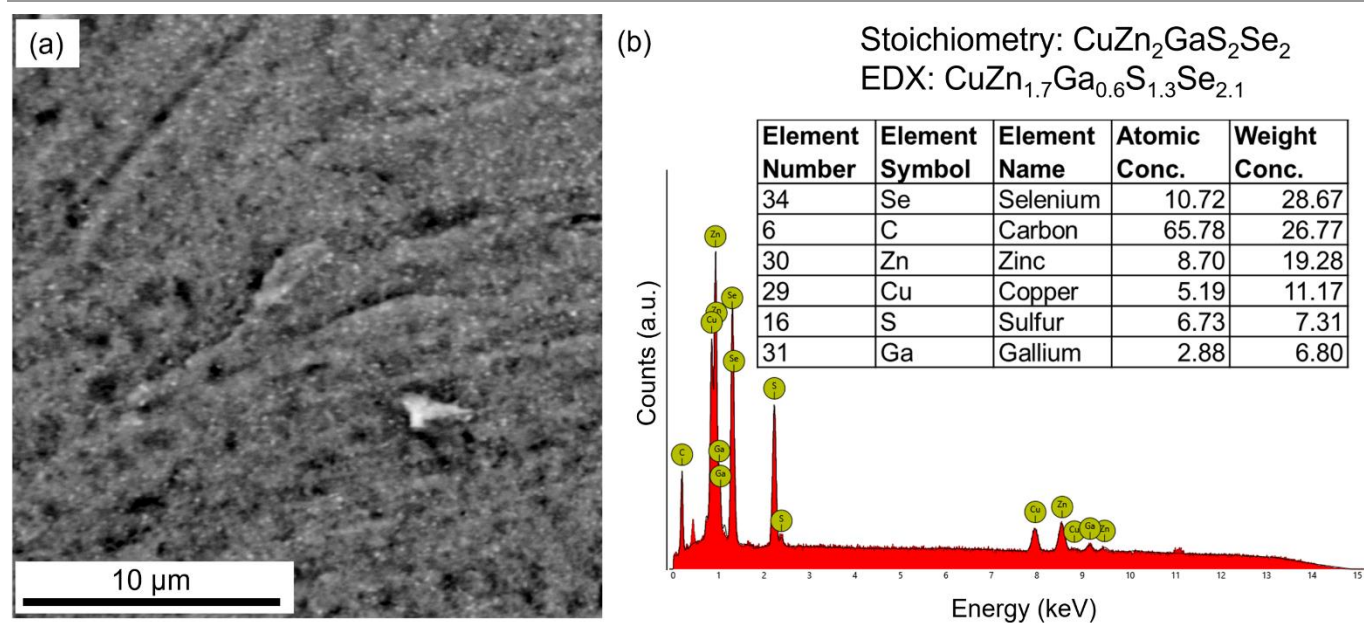

**Figure S9.** SEM and EDX characterization of  $\text{CuZn}_2\text{GaS}_2\text{Se}_2$  nanocrystals.

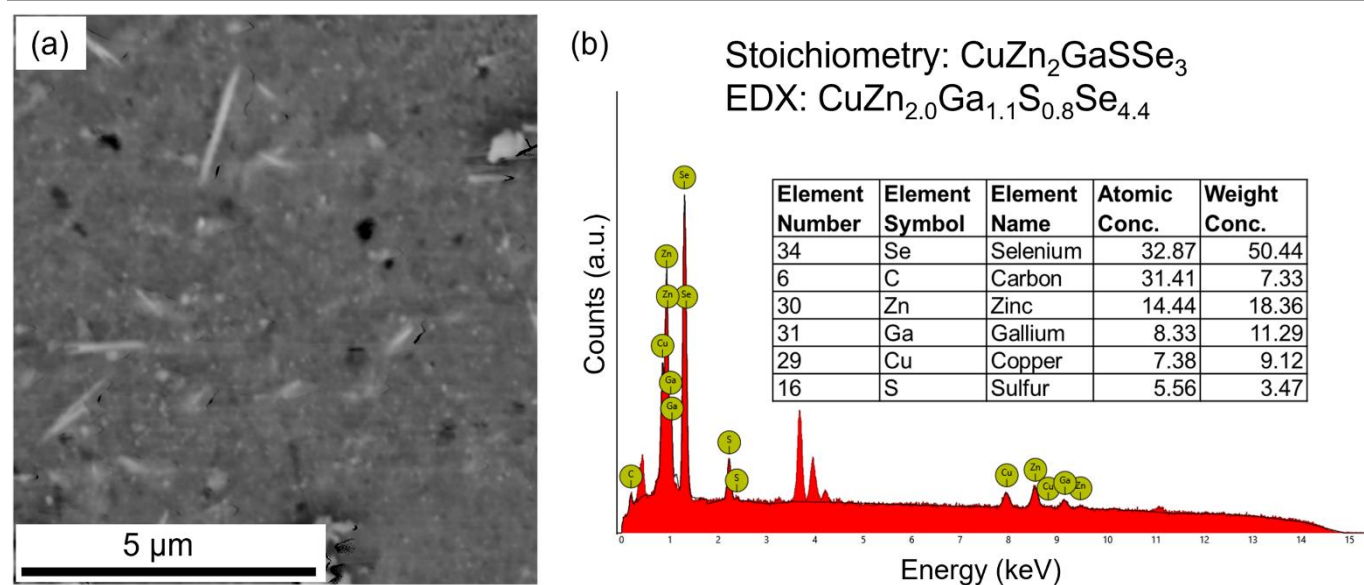

**Figure S10.** SEM and EDX characterization of  $\text{CuZn}_2\text{GaSSe}_3$  nanocrystals.

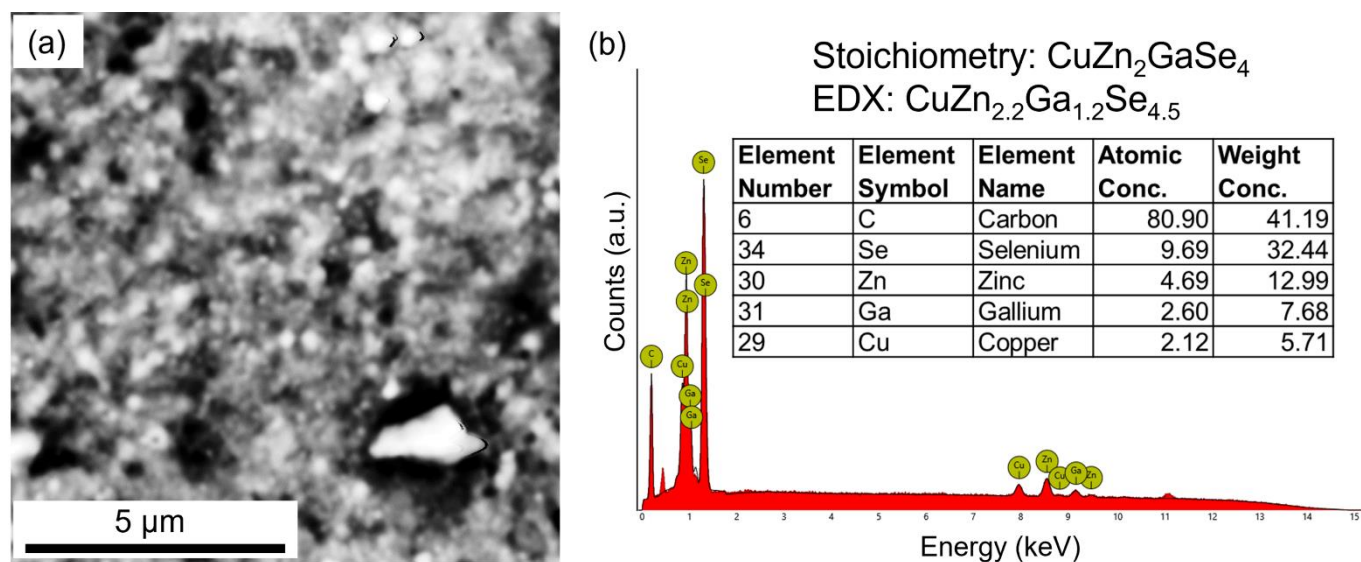

**Figure S11.** SEM and EDX characterization of  $\text{CuZn}_2\text{GaSe}_4$  nanocrystals.

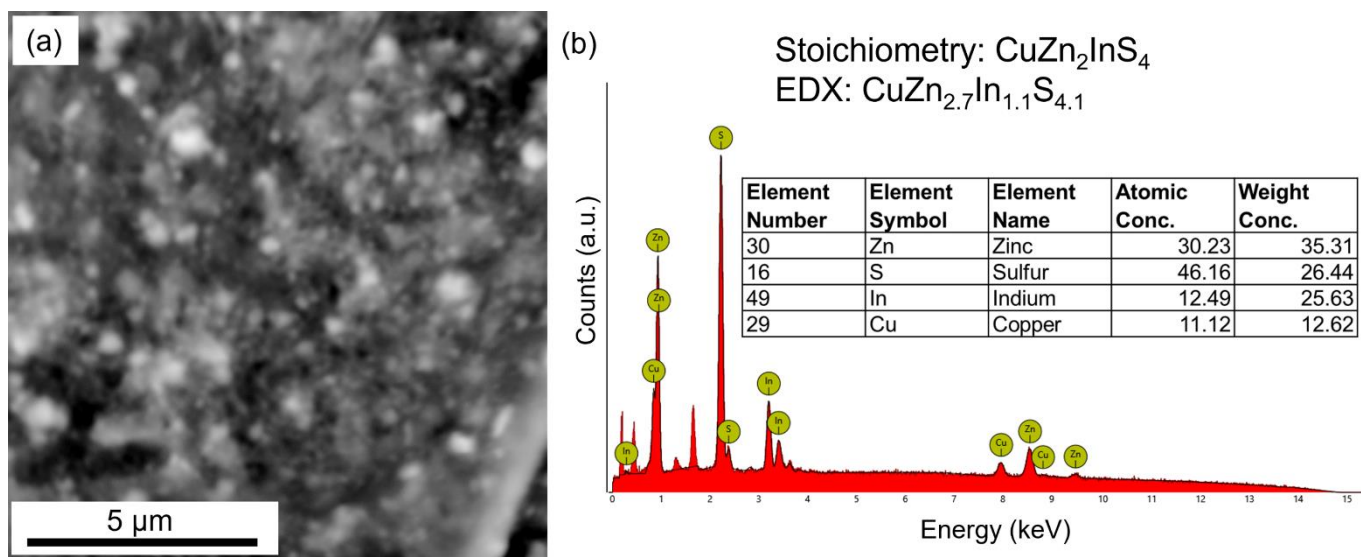

**Figure S12.** SEM and EDX characterization of  $\text{CuZn}_2\text{InS}_4$  nanocrystals.

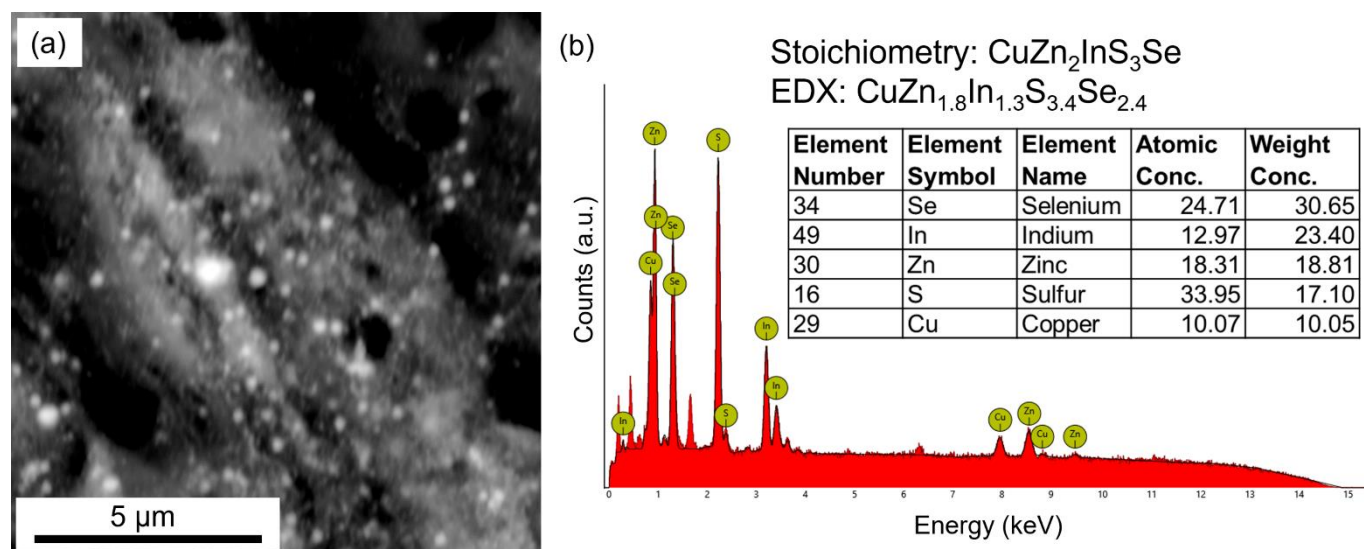

**Figure S13.** SEM and EDX characterization of  $\text{CuZn}_2\text{InS}_3\text{Se}$  nanocrystals.

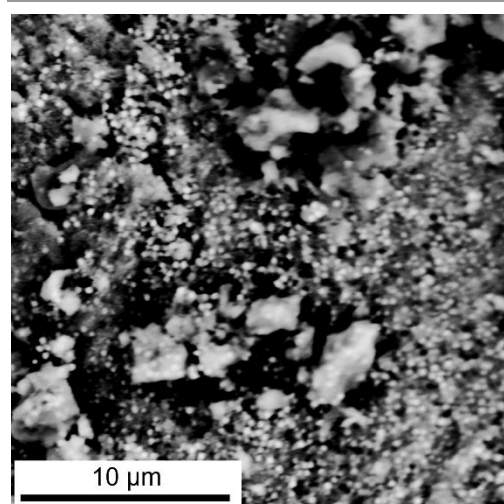

**Figure S14.** SEM characterization of  $\text{CuZn}_2\text{InS}_2\text{Se}_2$  nanocrystals.

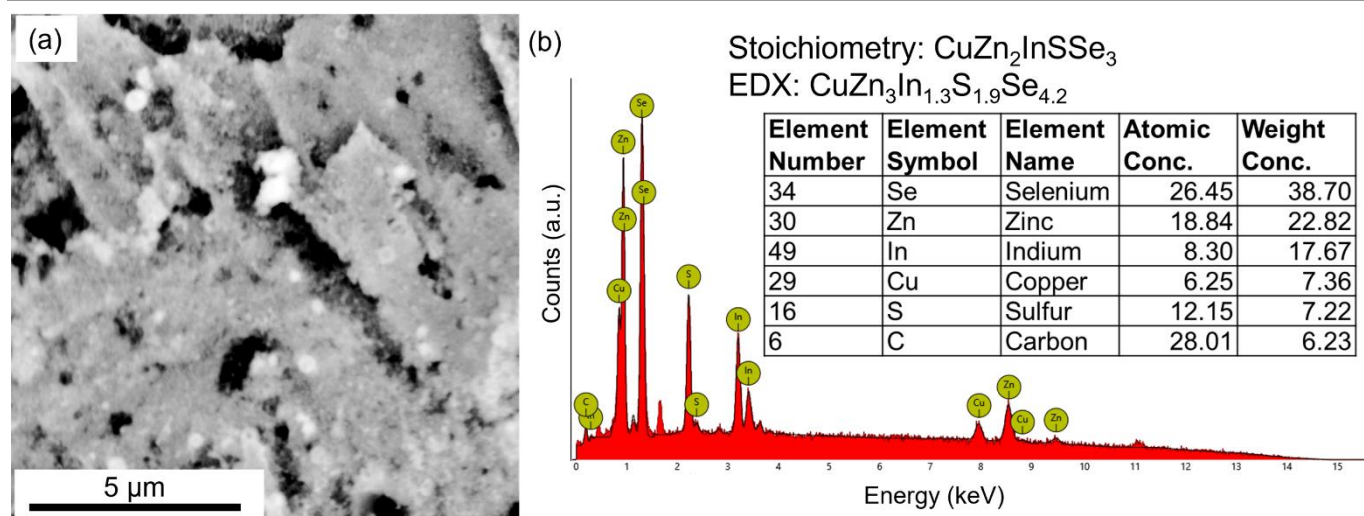

**Figure S15.** SEM and EDX characterization of  $\text{CuZn}_2\text{InSSe}_3$  nanocrystals.

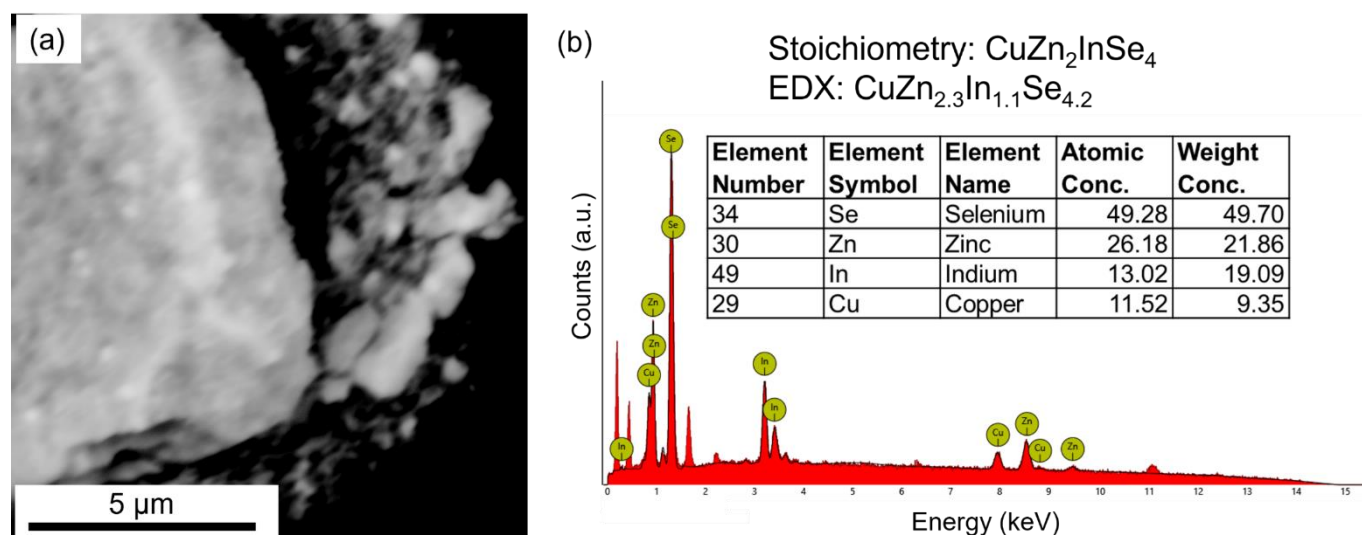

**Figure S16.** SEM and EDX characterization of CuZn<sub>2</sub>InSe<sub>4</sub> nanocrystals.

**Table S1.** Summary of direct experimental bandgaps of CZASSe nanocrystals

| Multinary nanocrystal composition                  | Eg_SCAN (eV) | Eg_HSE06 (eV) | Eg_experimental (eV) | % deviation w.r.t. SCAN | % deviation w.r.t. HSE06 | ChemComm Eg_experimental (eV) <sup>1</sup> | Standard deviation | Crystallite size from Debye-Scherrer formula (nm) |
|----------------------------------------------------|--------------|---------------|----------------------|-------------------------|--------------------------|--------------------------------------------|--------------------|---------------------------------------------------|
| CuZn <sub>2</sub> AlS <sub>4</sub>                 | 2.362        | 3.279         | 3.0                  | 18.9                    | 3.8                      | 1.78                                       | 0.05               | 23.45                                             |
| CuZn <sub>2</sub> AlS <sub>3</sub> Se              | 1.927        | 2.774         | 2.2                  | 9.7                     | 9.5                      |                                            |                    | 7.58                                              |
| CuZn <sub>2</sub> AlS <sub>2</sub> Se <sub>2</sub> | 1.656        | 2.467         | 2.4                  | 28.8                    | 11.6                     |                                            |                    | 10.93                                             |
| CuZn <sub>2</sub> AlSSe <sub>3</sub>               | 1.522        | 2.342         | 2.5                  | 36.8                    | 19.8                     |                                            |                    | 9.56                                              |
| CuZn <sub>2</sub> AlSe <sub>4</sub>                | 1.520        | 2.369         | 2.3                  | 31.0                    | 11.1                     |                                            |                    | 12.90                                             |
|                                                    |              |               |                      |                         |                          |                                            |                    |                                                   |
| CuZn <sub>2</sub> GaS <sub>4</sub>                 | 1.863        | 2.791         | 2.2                  | 19.9                    | 8.6                      | 1.64                                       | 0.04               | 4.83                                              |
| CuZn <sub>2</sub> GaS <sub>3</sub> Se              | 1.443        | 2.299         | 1.8                  | 25.6                    | 1.7                      |                                            |                    | 9.87                                              |
| CuZn <sub>2</sub> GaS <sub>2</sub> Se <sub>2</sub> | 1.182        | 2.002         | 2.5                  | 56.7                    | 36.5                     |                                            |                    | 7.66                                              |
| CuZn <sub>2</sub> GaSSe <sub>3</sub>               | 1.052        | 1.880         | 1.8                  | 46.6                    | 18.2                     |                                            |                    | 11.50                                             |
| CuZn <sub>2</sub> GaSe <sub>4</sub>                | 1.044        | 1.903         | 1.8                  | 46.6                    | 16.5                     |                                            |                    | 13.17                                             |
|                                                    |              |               |                      |                         |                          |                                            |                    |                                                   |
| CuZn <sub>2</sub> InS <sub>4</sub>                 | 1.214        | 2.116         | 2.8                  | 56.2                    | 35.4                     | 1.42                                       | 0.03               | 3.51                                              |
| CuZn <sub>2</sub> InS <sub>3</sub> Se              | 0.903        | 1.733         | 2.7                  | 66.2                    | 46.7                     |                                            |                    | 5.54                                              |
| CuZn <sub>2</sub> InS <sub>2</sub> Se <sub>2</sub> | 0.723        | 1.513         | 3.0                  | 75.6                    | 58.5                     |                                            |                    | 4.80                                              |
| CuZn <sub>2</sub> InSSe <sub>3</sub>               | 0.640        | 1.436         | 2.4                  | 72.6                    | 51.3                     |                                            |                    | 12.68                                             |
| CuZn <sub>2</sub> InSe <sub>4</sub>                | 0.650        | 1.473         | 2.4                  | 72.3                    | 50.0                     |                                            |                    | 18.28                                             |



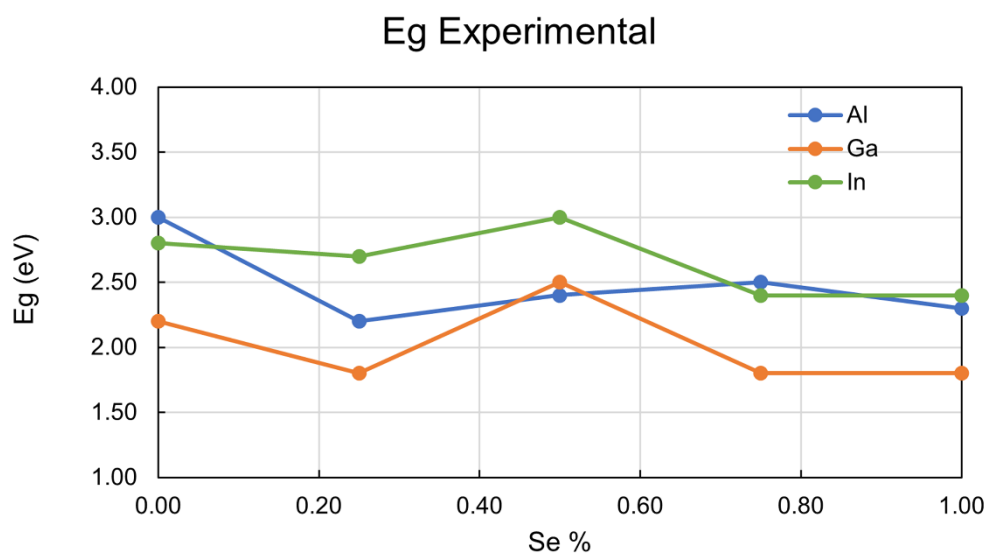

**Figure S17.** Plot showing variation of experimental bandgap of  $\text{CuZn}_2\text{AS}_x\text{Se}_{4-x}$  nanocrystal compositions with varying Se content of the nanocrystals.

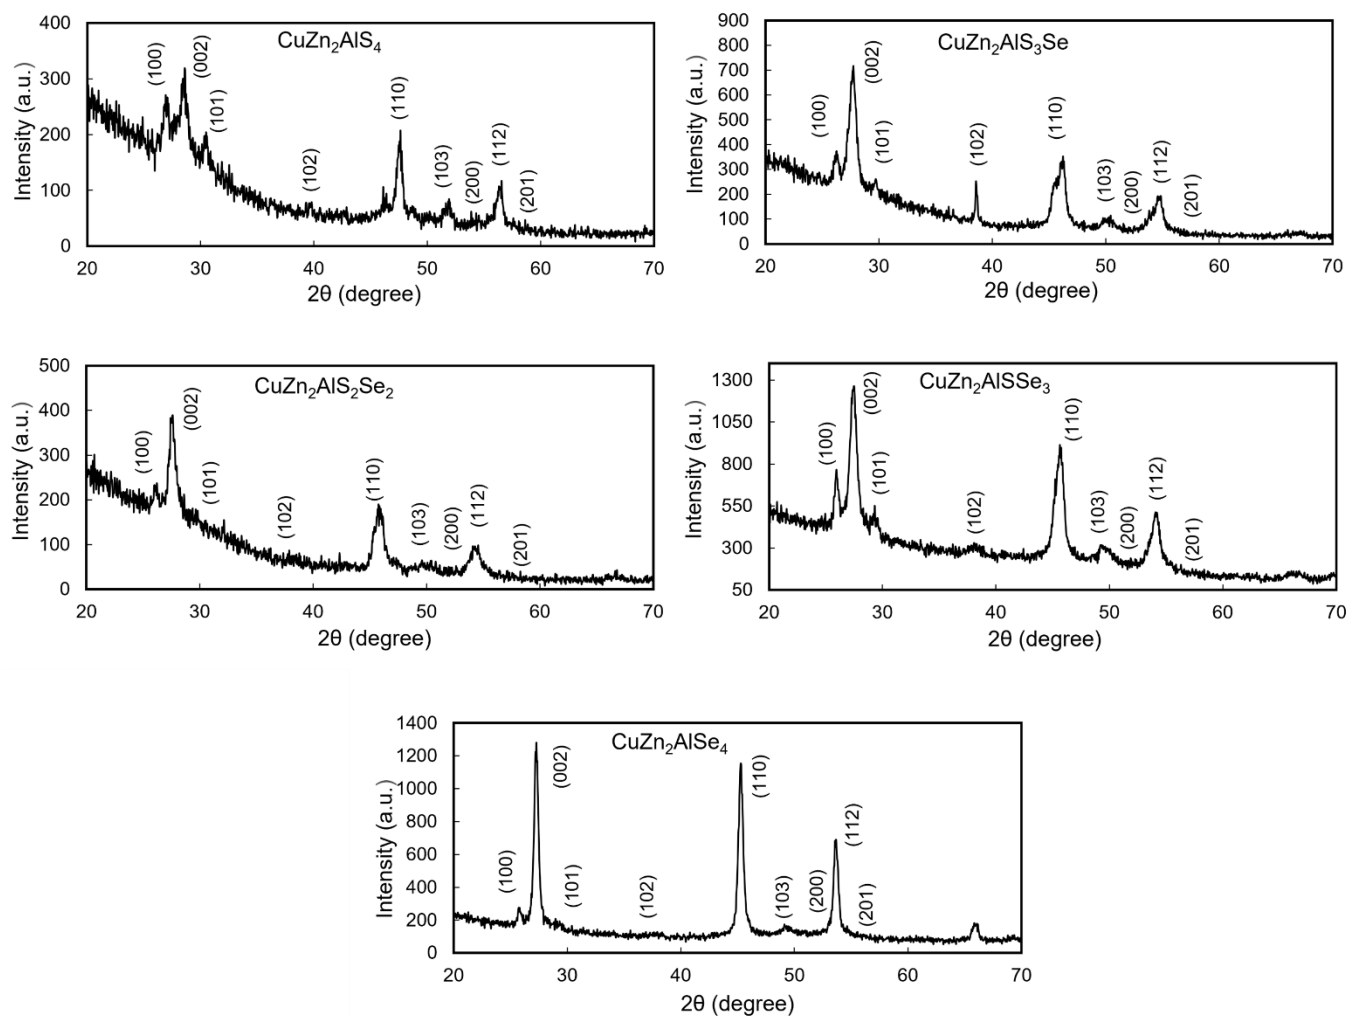

**Figure S18.** XRD characterization of the different wurtzite phase  $\text{CuZn}_2\text{AlS}_x\text{Se}_{4-x}$  nanocrystal compositions.

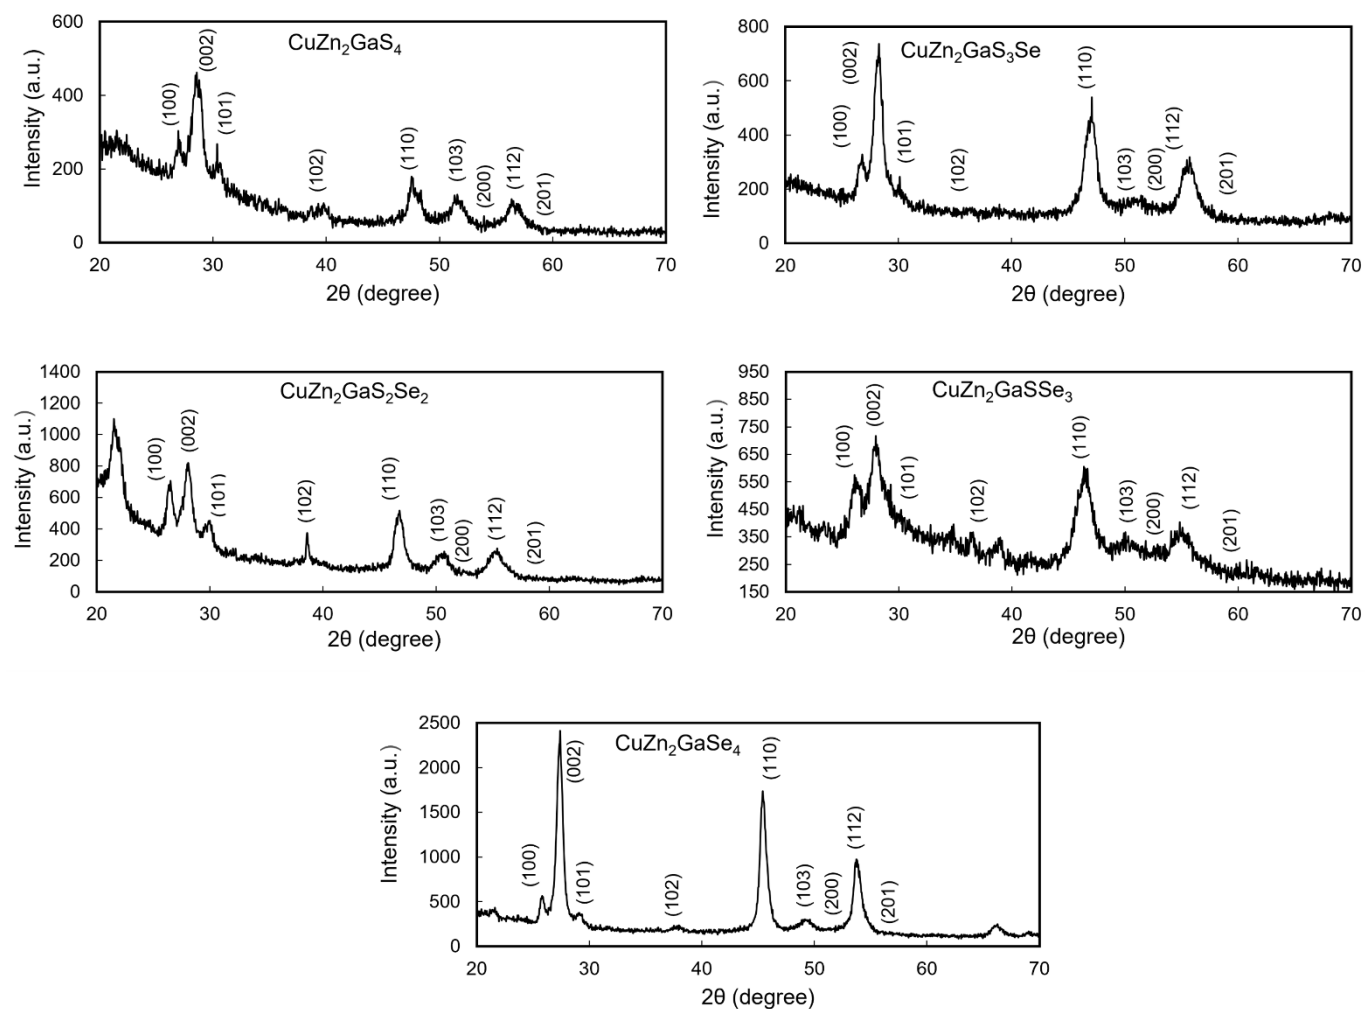

**Figure S19.** XRD characterization of the remaining wurtzite phase  $\text{CuZn}_2\text{GaS}_x\text{Se}_{4-x}$  nanocrystal compositions.

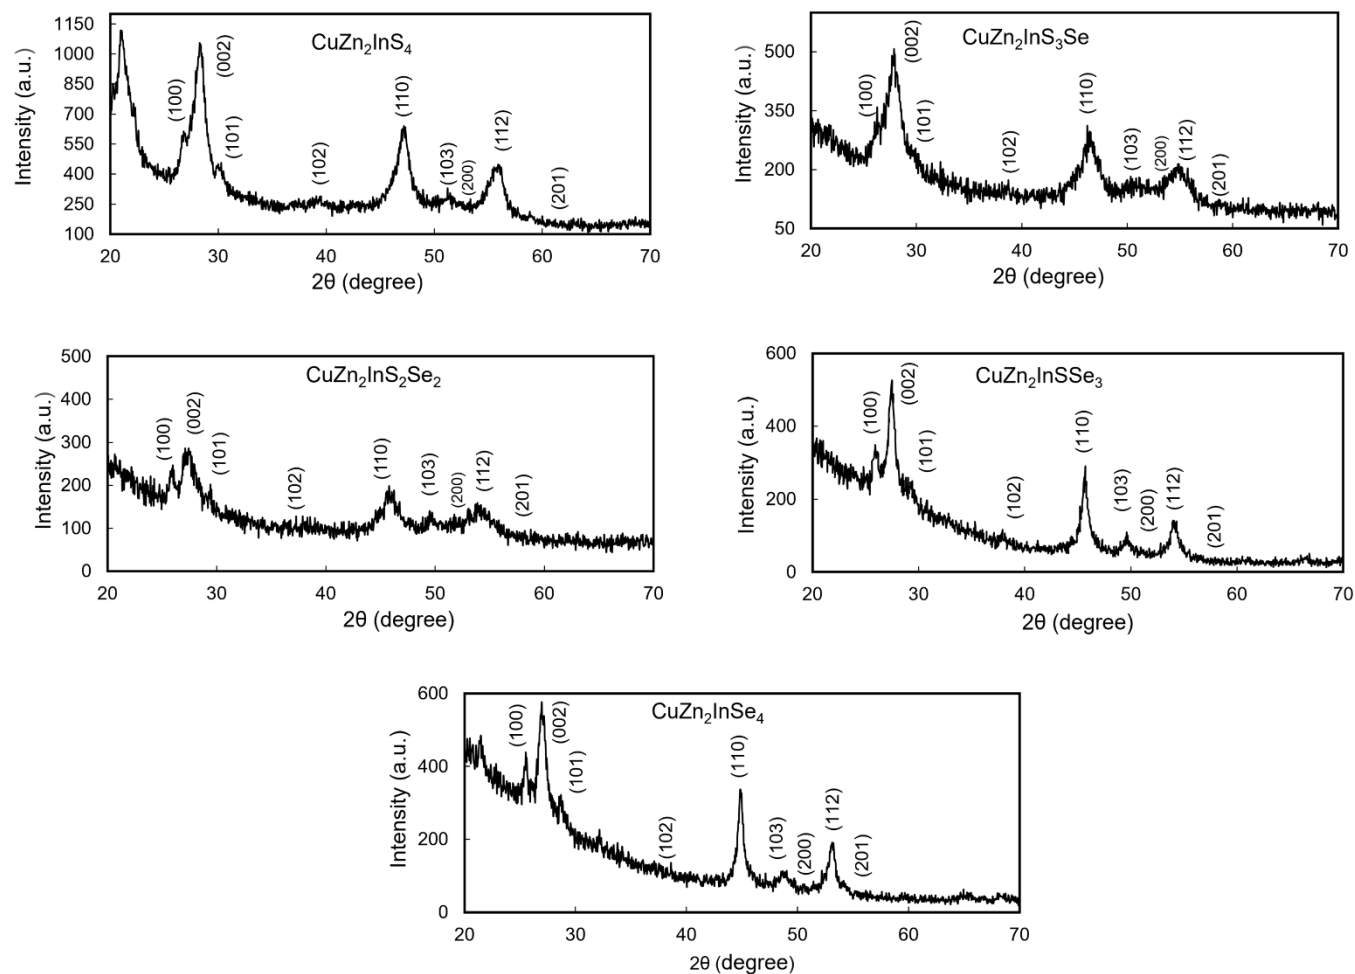

**Figure S20.** XRD characterization of different wurtzite phase  $\text{CuZn}_2\text{InS}_x\text{Se}_{4-x}$  nanocrystal compositions.



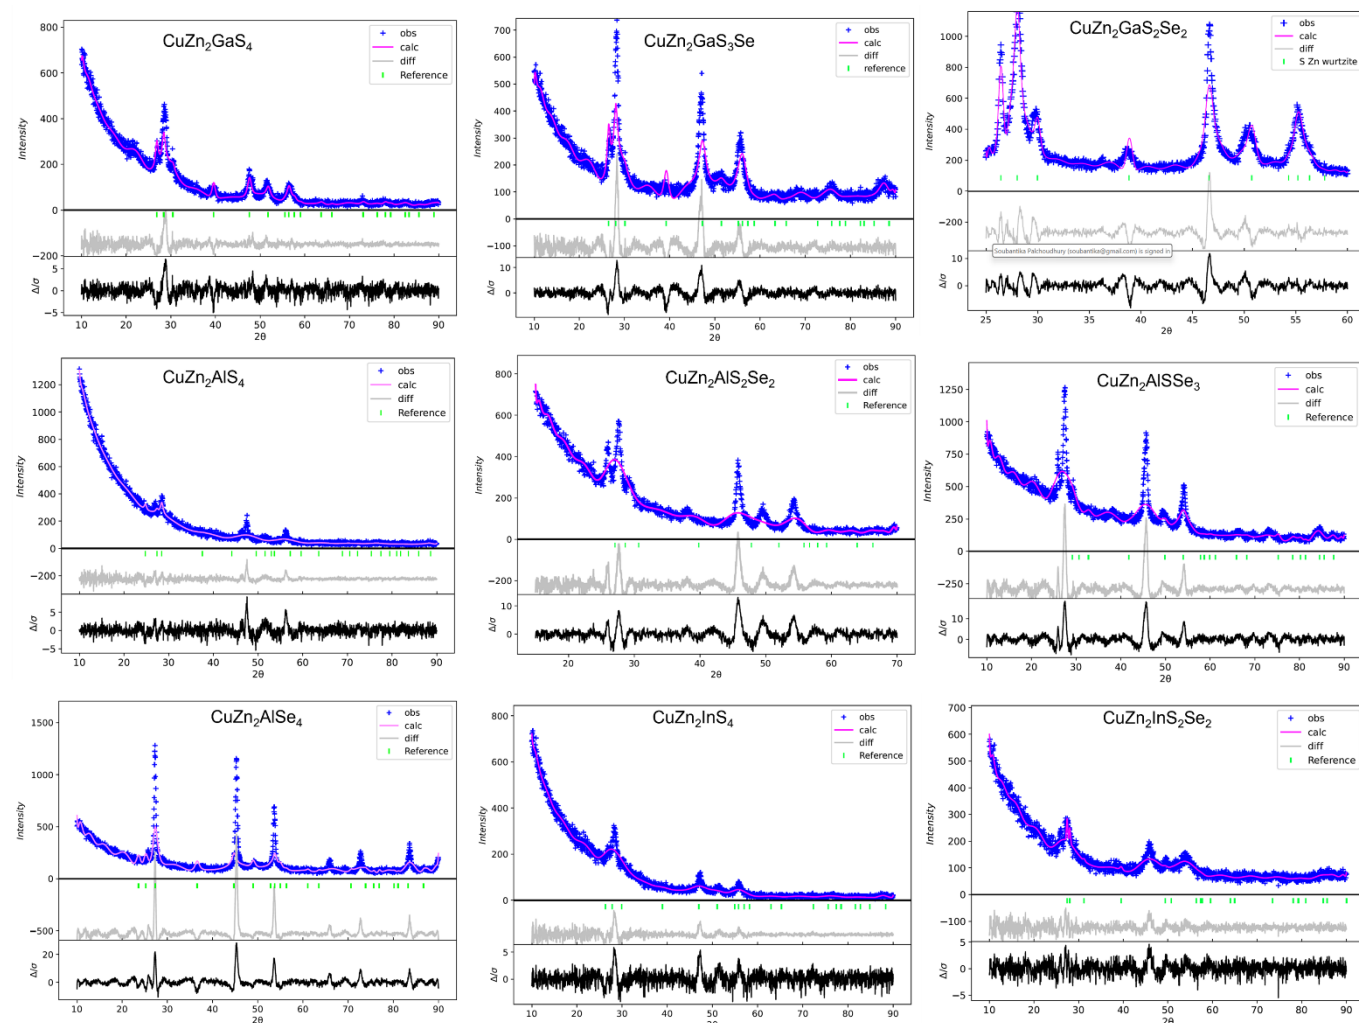

**Figure S21.** Rietveld fit of different CZASSe nanocrystal compositions.

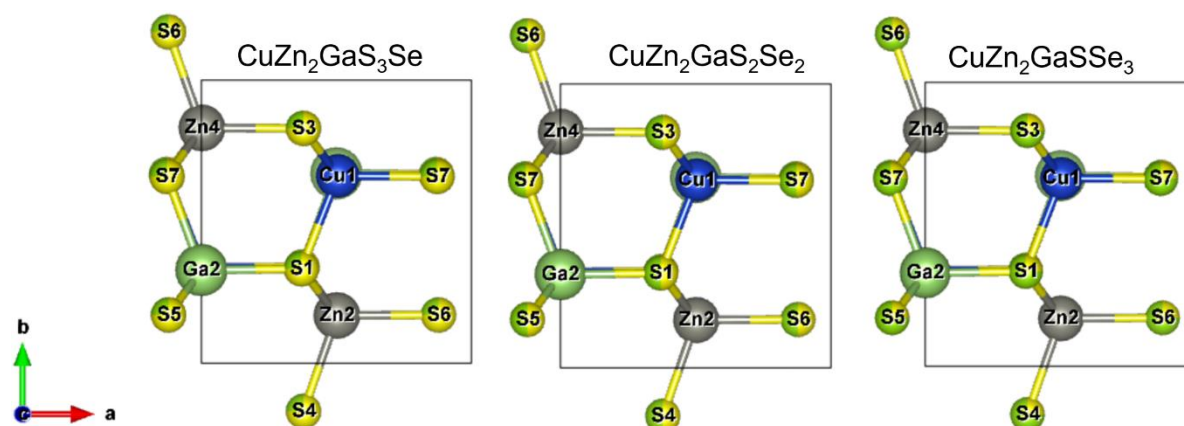

**Figure S22.** Unit cell of different  $\text{CuZn}_2\text{GaS}_x\text{Se}_{4-x}$  compositions used for electronic structure calculations.

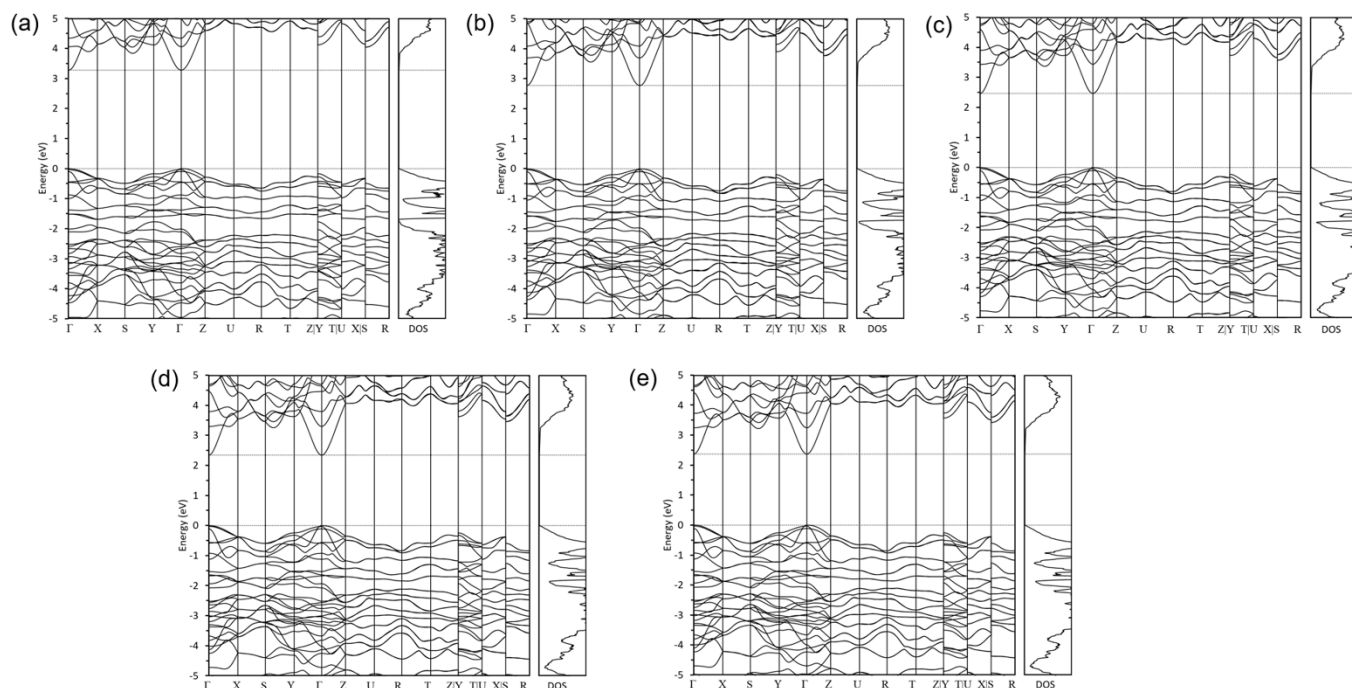

**Figure S23.** Electronic structures of different  $\text{CuZn}_2\text{AlS}_x\text{Se}_{4-x}$  compositions calculated using HSE06 hybrid functionals along with virtual crystal approximation. (a)  $\text{CuZn}_2\text{AlS}_4$ , (b)  $\text{CuZn}_2\text{AlS}_3\text{Se}$ , (c)  $\text{CuZn}_2\text{AlS}_2\text{Se}_2$ , (d)  $\text{CuZn}_2\text{AlSSe}_3$ , and (e)  $\text{CuZn}_2\text{AlSe}_4$ .

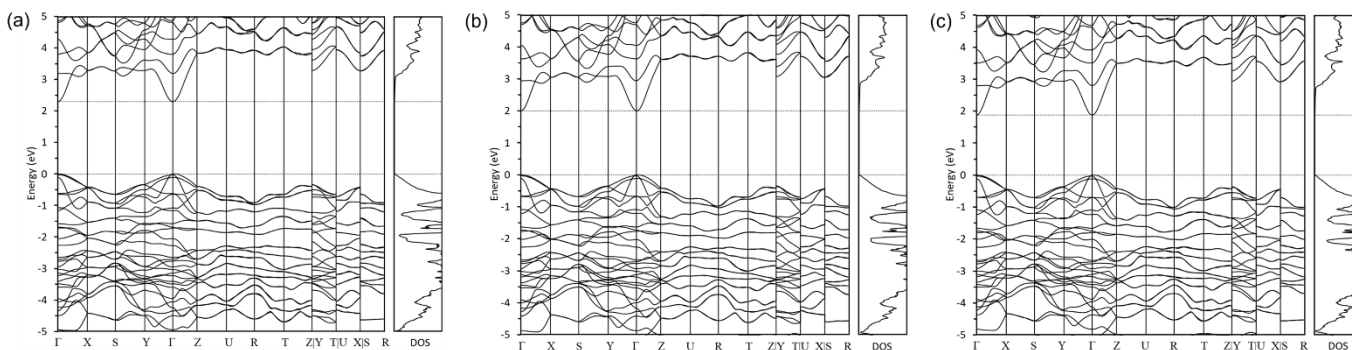

**Figure S24.** Electronic structures of different  $\text{CuZn}_2\text{GaS}_x\text{Se}_{4-x}$  compositions calculated using HSE06 hybrid functionals along with virtual crystal approximation. (a)  $\text{CuZn}_2\text{GaS}_3\text{Se}$ , (b)  $\text{CuZn}_2\text{GaS}_2\text{Se}_2$ , and (c)  $\text{CuZn}_2\text{GaSSe}_3$ .

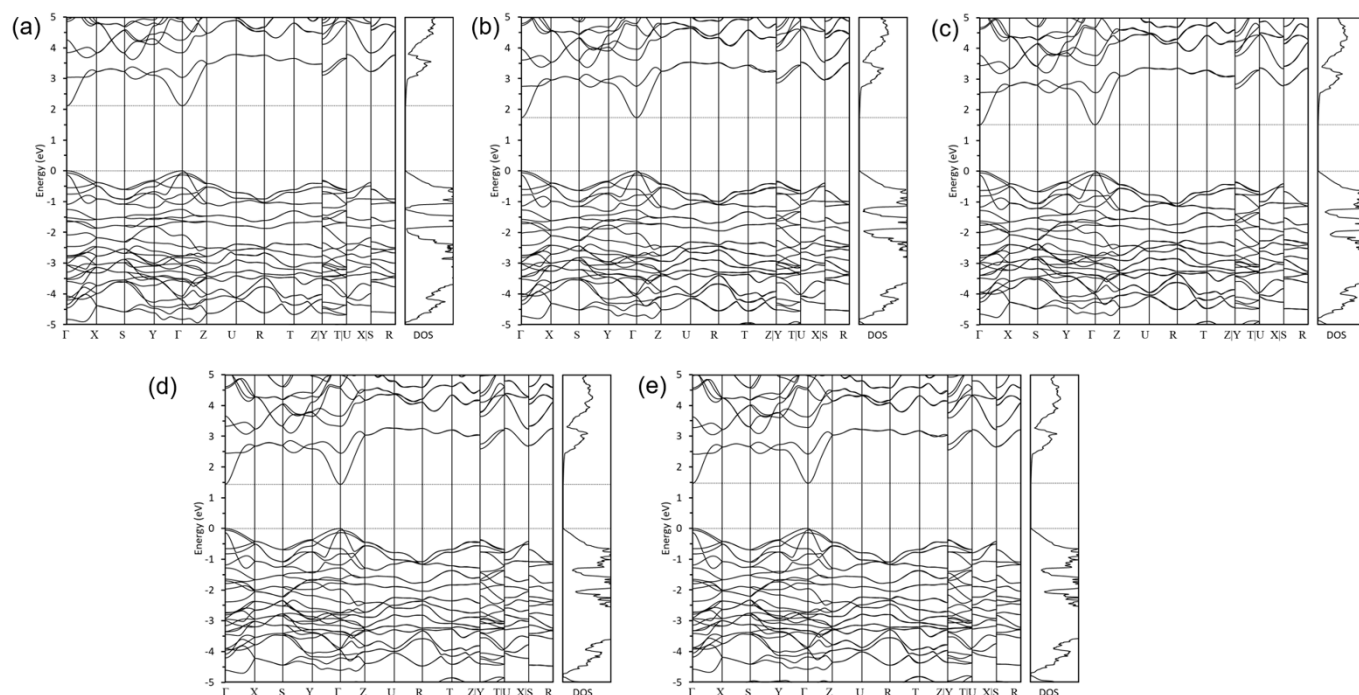

**Figure S25.** Electronic structures of different  $\text{CuZn}_2\text{InS}_x\text{Se}_{4-x}$  compositions calculated using HSE06 hybrid functionals along with virtual crystal approximation. (a)  $\text{CuZn}_2\text{InS}_4$ , (b)  $\text{CuZn}_2\text{InS}_3\text{Se}$ , (c)  $\text{CuZn}_2\text{InS}_2\text{Se}_2$ , (d)  $\text{CuZn}_2\text{InSSe}_3$ , and (e)  $\text{CuZn}_2\text{InSe}_4$ .

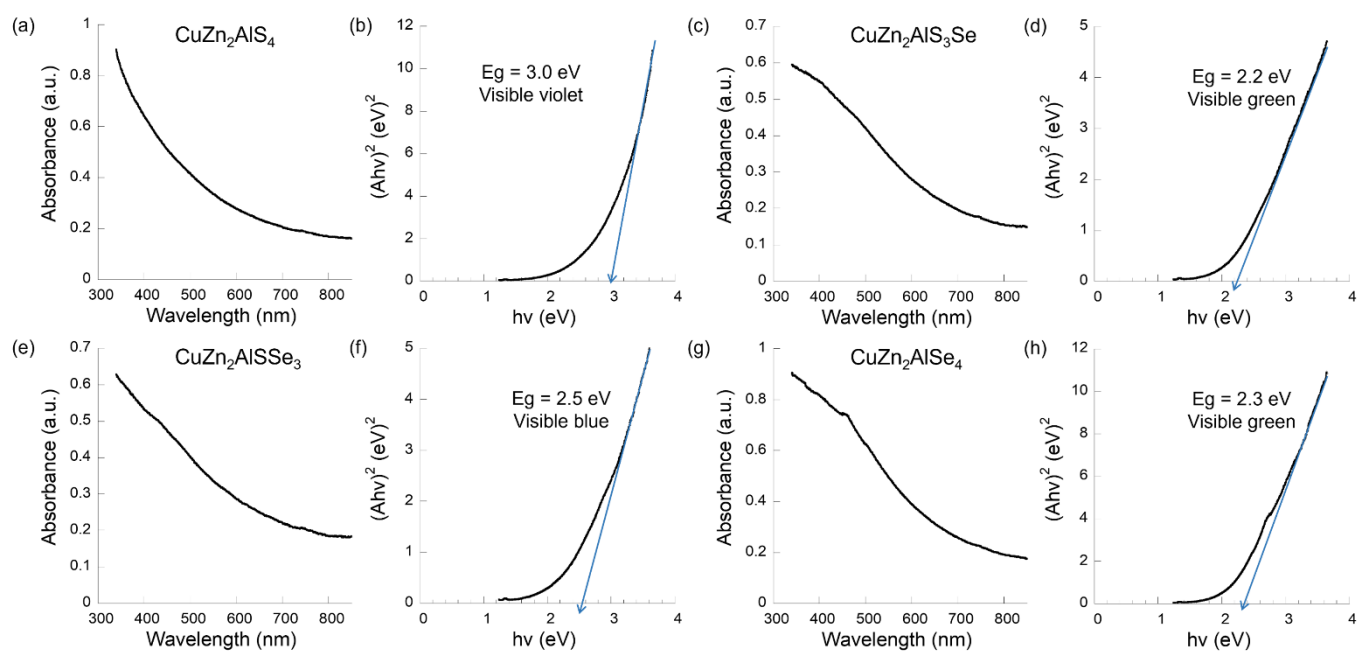

**Figure S26.** UV-vis and Tauc plots showing experimental bandgaps of  $\text{CuZn}_2\text{AlS}_x\text{Se}_{4-x}$  nanocrystals. (a-b)  $\text{CuZn}_2\text{AlS}_4$ , (c-d)  $\text{CuZn}_2\text{AlS}_3\text{Se}$ , (e-f)  $\text{CuZn}_2\text{AlS}_2\text{Se}_3$ , and (g-h)  $\text{CuZn}_2\text{AlSe}_4$ .

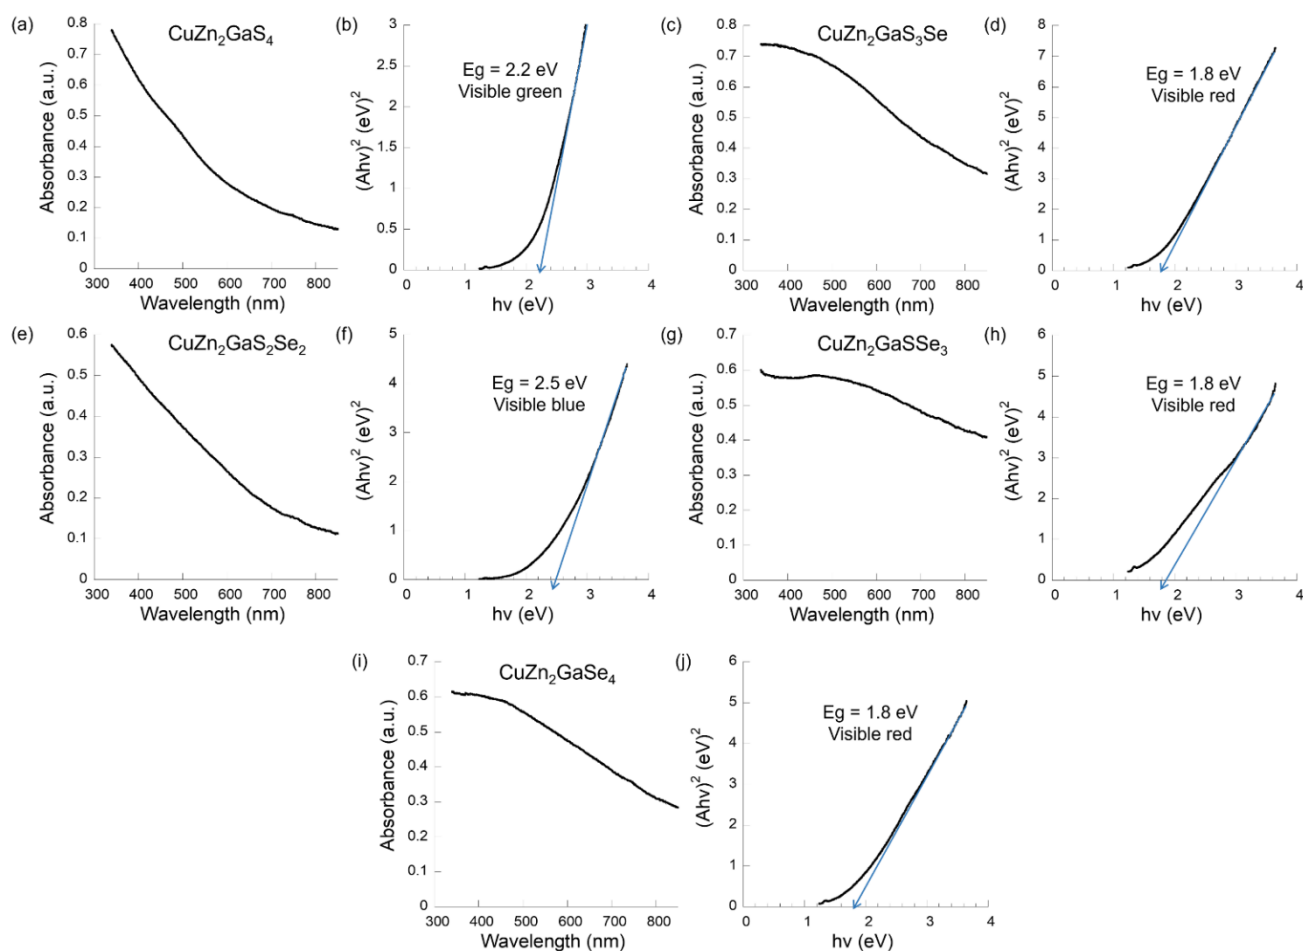

**Figure S27.** UV-vis and Tauc plots showing experimental bandgaps of  $\text{CuZn}_2\text{GaS}_x\text{Se}_{4-x}$  nanocrystals. (a-b)  $\text{CuZn}_2\text{GaS}_4$ , (c-d)  $\text{CuZn}_2\text{GaS}_3\text{Se}$ , (e-f)  $\text{CuZn}_2\text{GaS}_2\text{Se}_2$ , (g-h)  $\text{CuZn}_2\text{GaSSe}_3$ , and (i-j)  $\text{CuZn}_2\text{GaSe}_4$ .



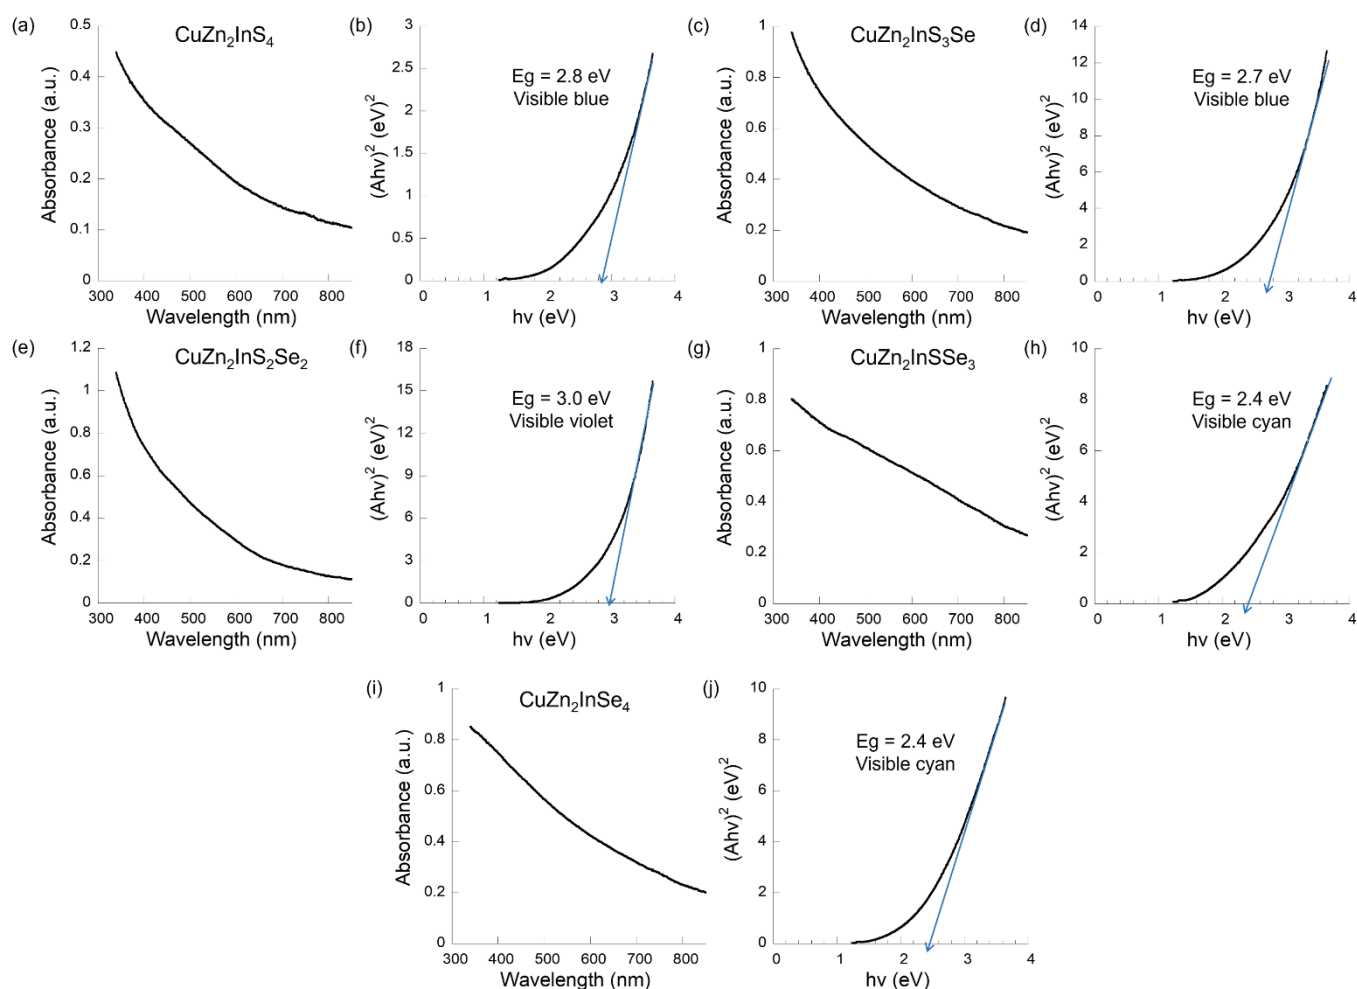

**Figure S28.** UV-vis and Tauc plots showing experimental bandgaps of  $\text{CuZn}_2\text{InS}_x\text{Se}_{4-x}$  nanocrystals. (a-b)  $\text{CuZn}_2\text{InS}_4$ , (c-d)  $\text{CuZn}_2\text{InS}_3\text{Se}$ , (e-f)  $\text{CuZn}_2\text{InS}_2\text{Se}_2$ , (g-h)  $\text{CuZn}_2\text{InSSe}_3$ , and (i-j)  $\text{CuZn}_2\text{InSe}_4$ .

## References

- 1 A. Ghosh, S. Palchoudhury, T. Rajalingam, Z. Zhou, N. Naghibolashrafi, K. Ramasamy and A. Gupta, *Chem. Commun.*, 2016, **52**, 264.
- 2 G. Kresse, *J. Non Cryst. Solids.*, 1995, **193**, 222.
- 3 G. Kresse and J. Furthmuller, *Phys. Rev. B*, 1996, **54**, 11169.
- 4 P.-E. Blochl, *Phys. Rev. B*, 1994, **50**, 17953.
- 5 G. Kresse and D. Joubert, *Phys. Rev. B*, 1999, **59**, 1758.
- 6 J. Sun, A. Ruzsinszky and J.-P. Perdew, *Phys. Rev. Lett.*, 2015, **115**, 036402.
- 7 L. Bellaiche and D. Vanderbilt, *Phys. Rev. B*, 2000, **61**, 7877.
- 8 J. Heyd, J.-E. Peralta, G.-E. Scuseria and R.-L. Martin, *J. Chem. Phys.*, 2005, **123**, 174101.
- 9 W. Setyawan and S. Curtarolo, *Comput. Mater. Sci.*, 2010, **49**, 299.
